# Supplementary material for: The importance of ethnicity: Are breast cancer polygenic risk scores ready for women who are not of White European origin?
Source: PubMed Central journal article supplement — Int J Cancer. 2021 Sep 7;150(1):73–9. doi: 10.1002/ijc.33782 (PMC9290473; doi:10.1002/ijc.33782), 2021-09-07
Supplement: IJC-150-73-s001.pdf [file IJC-150-73-s001.pdf]

## **The importance of Ethnicity: are breast cancer Polygenic Risk Scores ready for women who are not of white European origin?**

D. Gareth Evans,<sup>1-6</sup> Elke M van Veen,<sup>5,6</sup> Helen Byers,<sup>5,6</sup> Eleanor Roberts,<sup>3</sup> Anthony Howell,<sup>1,2,3</sup> Sacha J Howell,<sup>1,2,3</sup> Elaine F Harkness,<sup>1,7</sup> Adam Brentnall,<sup>8</sup> Jack Cuzick,<sup>8</sup> William G. Newman,<sup>4-6</sup>

### **Contents**

**Supplementary table 1:** Discrimination between cancers and controls in PROCAS using TC8 Density residual and SNP143 by white European and BAME groups

**Supplementary table 1:** Discrimination between cancers and controls in PROCAS using TC8 Density residual and SNP143 by white European and BAME groups

| White European | SNP143TC8DR | total | BC  | no BC | %BC    | % of BC | % of controls | ratio |
|----------------|-------------|-------|-----|-------|--------|---------|---------------|-------|
|                | <1%         | 167   | 14  | 153   | 8.38%  | 2.25%   | 8.53%         | 0.26  |
|                | 1-2%        | 582   | 92  | 490   | 15.81% | 14.81%  | 27.31%        | 0.54  |
|                | 2-3.5%      | 683   | 146 | 537   | 21.38% | 23.51%  | 29.93%        | 0.79  |
|                | 3.5-5%      | 345   | 102 | 243   | 29.57% | 16.43%  | 13.55%        | 1.21  |
|                | 5-7.9%      | 354   | 143 | 211   | 40.40% | 23.03%  | 11.76%        | 1.96  |
|                | 8%+         | 284   | 124 | 160   | 43.66% | 19.97%  | 8.92%         | 2.24  |
|                | total       | 2415  | 621 | 1794  | 25.71% | 100.00% | 100.00%       | 1.00  |
| <b>BAME</b>    |             |       |     |       |        |         |               |       |
|                | <1%         | 2     | 0   | 2     | 0.00%  | 0.00%   | 2.38%         | 0.00  |
|                | 1-2%        | 18    | 2   | 16    | 11.11% | 8.33%   | 19.05%        | 0.44  |
|                | 2-3.5%      | 28    | 8   | 20    | 28.57% | 33.33%  | 23.81%        | 1.40  |
|                | 3.5-5%      | 20    | 1   | 19    | 5.00%  | 4.17%   | 22.62%        | 0.18  |
|                | 5-7.9%      | 21    | 7   | 14    | 33.33% | 29.17%  | 16.67%        | 1.75  |
|                | 8%+         | 19    | 6   | 13    | 31.58% | 25.00%  | 15.48%        | 1.62  |
|                | total       | 108   | 24* | 84    | 22.22% | 100.00% | 100.00%       | 1.00  |

BC-breast cancer; \* This excludes 6 BAME cases from previous cancers in which TC8DRSNP143 was not available
